# Supplementary material for: Rapid drop in the reproduction number during the Ebola outbreak in the Democratic Republic of Congo
Source: PeerJ. 2015 Nov 19;3:e1418. doi: 10.7717/peerj.1418 (PMC4655090; doi:10.7717/peerj.1418)
Supplement: Data S1 [file peerj-03-1418-s001.csv]

Date	Cumulative	Cases
26 Jul 2014	1	1
27 Jul 2014	1	0
28 Jul 2014	1	0
29 Jul 2014	1	0
30 Jul 2014	1	0
31 Jul 2014	1	0
01 Aug 2014	1	0
02 Aug 2014	1	0
03 Aug 2014	3	2
04 Aug 2014	4	1
05 Aug 2014	4	0
06 Aug 2014	4	0
07 Aug 2014	6	2
08 Aug 2014	6	0
09 Aug 2014	6	0
10 Aug 2014	7	1
11 Aug 2014	10	3
12 Aug 2014	11	1
13 Aug 2014	16	5
14 Aug 2014	19	3
15 Aug 2014	21	2
16 Aug 2014	23	2
17 Aug 2014	25	2
18 Aug 2014	28	3
19 Aug 2014	30	2
20 Aug 2014	35	5
21 Aug 2014	36	1
22 Aug 2014	38	2
23 Aug 2014	40	2
24 Aug 2014	42	2
25 Aug 2014	43	1
26 Aug 2014	46	3
27 Aug 2014	46	0
28 Aug 2014	46	0
29 Aug 2014	47	1
30 Aug 2014	48	1
31 Aug 2014	49	1
01 Sep 2014	49	0
02 Sep 2014	50	1
03 Sep 2014	51	1
04 Sep 2014	54	3
05 Sep 2014	56	2
06 Sep 2014	58	2
07 Sep 2014	58	0
08 Sep 2014	59	1
09 Sep 2014	60	1
10 Sep 2014	60	0
11 Sep 2014	61	1
12 Sep 2014	62	1
13 Sep 2014	63	1
14 Sep 2014	64	1
15 Sep 2014	64	0
16 Sep 2014	64	0
17 Sep 2014	64	0
18 Sep 2014	65	1
19 Sep 2014	66	1
20 Sep 2014	67	1
21 Sep 2014	67	0
22 Sep 2014	67	0
23 Sep 2014	67	0
24 Sep 2014	68	1
25 Sep 2014	68	0
26 Sep 2014	68	0
27 Sep 2014	68	0
28 Sep 2014	68	0
29 Sep 2014	68	0
30 Sep 2014	68	0
01 Oct 2014	68	0
02 Oct 2014	68	0
03 Oct 2014	68	0
04 Oct 2014	69	1
05 Oct 2014	69	0
06 Oct 2014	69	0
07 Oct 2014	69	0
08 Oct 2014	69	0
09 Oct 2014	69	0
10 Oct 2014	69	0
11 Oct 2014	69	0
12 Oct 2014	69	0
13 Oct 2014	69	0
14 Oct 2014	69	0
15 Oct 2014	69	0
16 Oct 2014	69	0
17 Oct 2014	69	0
18 Oct 2014	69	0
19 Oct 2014	69	0
20 Oct 2014	69	0
21 Oct 2014	69	0
22 Oct 2014	69	0
23 Oct 2014	69	0
24 Oct 2014	69	0
25 Oct 2014	69	0
26 Oct 2014	69	0
27 Oct 2014	69	0
28 Oct 2014	69	0
29 Oct 2014	69	0
30 Oct 2014	69	0
31 Oct 2014	69	0
01 Nov 2014	69	0
02 Nov 2014	69	0
03 Nov 2014	69	0
04 Nov 2014	69	0
05 Nov 2014	69	0
06 Nov 2014	69	0
07 Nov 2014	69	0
08 Nov 2014	69	0
09 Nov 2014	69	0
10 Nov 2014	69	0
11 Nov 2014	69	0
12 Nov 2014	69	0
13 Nov 2014	69	0
14 Nov 2014	69	0
15 Nov 2014	69	0
16 Nov 2014	69	0
17 Nov 2014	69	0
18 Nov 2014	69	0
19 Nov 2014	69	0
20 Nov 2014	69	0
