# Supplementary material for: Rapid drop in the reproduction number during the Ebola outbreak in the Democratic Republic of Congo
Source: PeerJ journal article supplement (doi:10.7717/peerj.1418), 2015-11-19

Case reproduction number  $R$

8  
7  
6  
5  
4  
3  
2  
1  
0

26 Jul 2014

23 Aug 2014

20 Sep 2014

18 Oct 2014

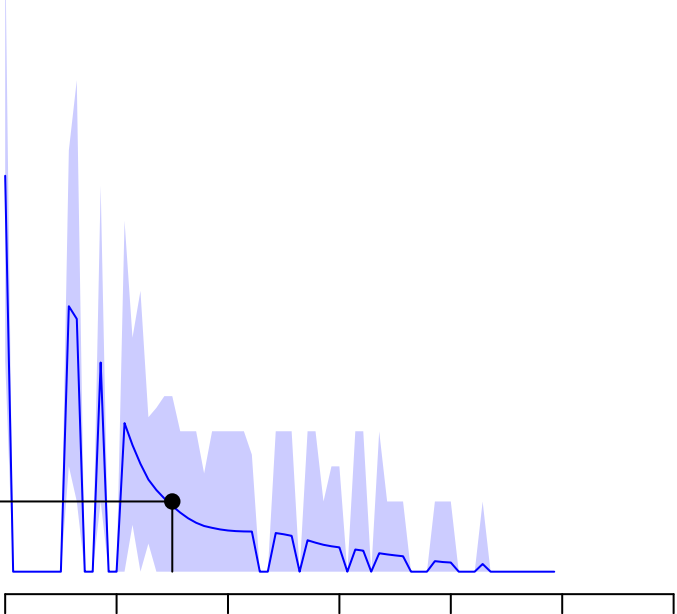

Supplement: FigureS1.pdf [file FigureS1.pdf]
